# Supplementary material
Source: PubMed Central journal article supplement (PMC2747344)
Supplement: 00064.2009_1.pdf [file 00064.2009_1.pdf]

1 Supplementary Table 1. Oligonucleotide primer sequence and expected amplicon size used for real-time PCR assays  
2

| Gene          | Primer sequence (5'->3')                                  | GenBank accession no. | Entrez Gene | Product length (bp) |
|---------------|-----------------------------------------------------------|-----------------------|-------------|---------------------|
| <i>AHSG</i>   | For GACTTGCGCCACACTTTCTC<br>Rev CTGATTCTCCCTGGGCAAAG      | NM_173984.2           | 280988      | 137                 |
| <i>PKD4</i>   | F GGCCTAGTGTGTGGTGCTTC<br>R GAGCCAGAGTCCCATAATCAAG        | NM_001101883.1        | 507367      | 120                 |
| <i>SI00A8</i> | F TGCCATTA ACTCCCTGATTGAC<br>R TAATTCACCATCCTGATTGAT      | NM_001113725.1        | 616818      | 179                 |
| <i>MMP1</i>   | F GGTCAGGTTTATAGCTTATGGATTC<br>R TTGAGAGAAGACATCACGGAGA   | NM_174112.1           | 281308      | 120                 |
| <i>MMP3</i>   | F GATGATGAACAATGGACAAAGG<br>R CGAGGGTCGTAGACTGGGTA        | XM_586521.2           | 281309      | 134                 |
| <i>MMP9</i>   | F GAGGGTAAGGTGCTGCTGTTTC<br>R AAGGTCACGTAGCCACATAGT       | NM_174744.2           | 282871      | 236                 |
| <i>MMP13</i>  | F ACCCTTCCCATGACCTTATCTT<br>R TCTTCCCTGAATCCTCAAAGTG      | NM_174389.2           | 281914      | 162                 |
| <i>IL1R</i>   | For TAATACGATGAGTTCCCAGACG<br>Rev TTA CTGGATAGGATTGCGAAT  | NM_001046210.1        | 515640      | 207                 |
| <i>IL1B</i>   | For CTTGGGTATCAAGGACAAGAAT<br>Rev TCGATTTGAGAAGTGCTGATGT  | NM_174093.1           | 281251      | 207                 |
| <i>IL8</i>    | For TAGGACATGCTTATATTTTAG<br>Rev CAGTTTAGGAATAAAGAAACCAAG | NM_173925             | 280828      | 171                 |
| <i>IL8RB</i>  | For CCCACCTCTTGCTATAATCACC<br>Rev CTGACAAGGAAAGGGAGAGCTA  | NM_174360.2           | 281863      | 194                 |
| <i>PTGS2</i>  | For CGTTACCCTGGATGTGCTGAC<br>Rev TTTCTCCCTTTGCCTAACAG     | NM_174445             | 282023      | 200                 |
| <i>TBXAS1</i> | For GCGTCTACATCAGAATCGTCTC<br>Rev TCAACTGCTTCGGTGGTGTT    | NM_001046027          | 509326      | 103                 |
| <i>AKR1C4</i> | For TAAGTACAAGCCCGTCTGCAA<br>Rev AACTGGGTCCCTCCAAGAGAAAG  | NM_181027             | 282138      | 175                 |
| <i>CXCL5</i>  | For GCCACTAAGCATGTATTTTTGA<br>Rev TTAGCAAGGCTG TGCATT TTT | NM_174300             | 281735      | 479                 |
| <i>DEFB7</i>  | For CTCTTCCTGGTCCTGTCTGC<br>Rev GCTGTGTCTTGGCCTTCTTT      | NM_001102362.1        | 768320      | 184                 |
| <i>LAP</i>    | For GCCAGCATGAGGCTCCATC<br>Rev CTCCTGCAGCATTTTACTTGGGCT   | NM_203435.3           | 403090      | 194                 |
| <i>DEFB1</i>  | For AGCTGCCGTCTGAATAGAGG<br>Rev AAGGCCGCAGTTTCTGTCT       | NM_175703.3           | 281743      | 160                 |

|               |                                                          |                |        |     |
|---------------|----------------------------------------------------------|----------------|--------|-----|
| <i>DEFB5</i>  | For GCCAGCATGAGGCTCCATC<br>Rev TTGCCAGGGCACGAGATCG       | NM_001130761.1 | 783935 | 143 |
| <i>IGF1</i>   | For AGTTGGTGGATGCTCTCCAGT<br>Rev CACTCATCCACGATTCCTGTC   | NM_001077828.1 | 281239 | 115 |
| <i>IGFBP1</i> | For TCAAGAAGTGGAAGGAGCCCT<br>Rev AATCCATTCTTGTTGCAGTTT   | NM_174554      | 282259 | 127 |
| <i>IGFBP6</i> | For GGAGAGAATCCCAAGGAGAGTAA<br>Rev GAGTGGTAGAGGTCCCCGAGT | NM_001040495.1 | 404186 | 100 |

---

Housekeeping Genes

|              |                                                         |                |        |     |
|--------------|---------------------------------------------------------|----------------|--------|-----|
| <i>RPL19</i> | For TCGATGCCGAAAAACAC<br>Rev ATTCTCATCCTCCTCATCCAG      | NM_001040516   | 510615 | 119 |
| <i>GAPDH</i> | For GGC GTGAACCACGAGAAGTATAA<br>Rev CCCTCCACGATGCCAAAGT | NM_001034034.1 | 281181 | 120 |
| 18SrRNA      | For CGGCGACGCCCATTCGAAC<br>Rev GAATCGAACCTGATTCCCCGTC   | AY779625       |        | 99  |

---

3  
4
