# Supplementary material
Source: PubMed Central journal article supplement (PMC2747344)
Supplement: 00064.2009_2.pdf [file 00064.2009_2.pdf]

1 Supplementary Table 2. Differentially expresses genes in endometrium of SNEB cows mapped to the IPA database which were  
 2 included in immune and inflammatory gene dataset.  
 3

| Gene Symbol (no. probes)         | Real Fold changes | Adj P-Value (Bonferroni) | Gene Title                                      | Probe Names                             | Entrez Gene |
|----------------------------------|-------------------|--------------------------|-------------------------------------------------|-----------------------------------------|-------------|
| <b>UP-REGULATED IN SNEB COWS</b> |                   |                          |                                                 |                                         |             |
| <i>ACTN4</i>                     | 7.99              | <10 <sup>-10</sup>       | Actinin, alpha 4                                | Bt_16790_2_S1_at                        | 522269      |
| <i>AHSG (x4)</i>                 | 7.73              | <10 <sup>-10</sup>       | Alpha-2-HS-glycoprotein                         | Bt_23250_7_A1_x_at                      | 280988      |
|                                  | 8.01              | <10 <sup>-10</sup>       |                                                 | Bt_23250_5_A1_at                        |             |
|                                  | 6.94              | <10 <sup>-10</sup>       |                                                 | Bt_23250_1_A1_x_at                      |             |
|                                  | 3.94              | <10 <sup>-10</sup>       |                                                 | Bt_23250_6_A1_x_at                      |             |
|                                  | 3.21              | 5.3x10 <sup>-7</sup>     |                                                 | Aldo-keto reductase family 1, member C4 |             |
| <i>BCL2A1</i>                    | 3.28              | 0.0002                   | BCL2-related protein A1                         | Bt_7542_1_S1_at                         | 282151      |
| <i>BLA-DQB</i>                   | 11.3              | <10 <sup>-10</sup>       | MHC class II antigen                            | Bt_7220_1_S1_at                         | 539241      |
| <i>BOLA</i>                      | 1.87              | 0.0142                   | MHC class I heavy chain                         | Bt_29815_1_S1_x_at                      | 515712      |
| <i>CIQA</i>                      | 2.29              | 3.4x10 <sup>-5</sup>     | Complement component 1, q subcomponent, A chain | Bt_1577_1_S1_at                         | 534961      |
| <i>CIQB</i>                      | 2.30              | 7.4x10 <sup>-6</sup>     | Complement component 1, q subcomponent, B chain | Bt_20164_1_S1_at                        | 617435      |
| <i>CIQC</i>                      | 2.21              | 3.1x10 <sup>-5</sup>     | Complement component 1, q subcomponent, C chain | Bt_21576_1_S1_at                        | 509968      |
| <i>C3(x2)</i>                    | 4.25              | 3.4x10 <sup>-5</sup>     | Complement component 3                          | Bt_4209_2_S1_at                         | 280677      |
|                                  | 3.28              | 0.0007                   |                                                 | Bt_4209_2_S1_a_at                       |             |
| <i>CCR5</i>                      | 1.94              | 0.0036                   | Chemokine (C-C motif) receptor 5                | Bt_21331_2_S1_at                        | 497017      |
| <i>CCR7</i>                      | 2.81              | 0.0099                   | Chemokine (C-C motif) receptor 7                | Bt_12241_1_S1_at                        | 510668      |
| <i>CD36</i>                      | 2.88              | 7.7x10 <sup>-9</sup>     | CD36 molecule (thrombospondin receptor)         | Bt_5392_1_S1_at                         | 281052      |
| <i>CD48</i>                      | 2.89              | <10 <sup>-10</sup>       | CD48 molecule                                   | Bt_13293_1_S1_at                        | 508386      |
| <i>CD53</i>                      | 3.04              | <10 <sup>-10</sup>       | CD53 molecule                                   | Bt_14005_1_S1_at                        | 505040      |
| <i>CD69</i>                      | 2.62              | 0.0002                   | CD69 molecule                                   | Bt_8544_1_S1_at                         | 281058      |
| <i>CD79A</i>                     | 1.83              | 0.0001                   | CD79a molecule, immunoglobulin-associated alpha | Bt_4436_1_S1_a_at                       | 281674      |
| <i>CDH17</i>                     | 2.12              | 6.7x10 <sup>-6</sup>     | Cadherin 17                                     | Bt_28258_1_S1_at                        | 507526      |
| <i>CFB</i>                       | 2.91              | 9.8x10 <sup>-7</sup>     | Complement factor B                             | Bt_13542_1_S1_at                        | 514076      |
| <i>CFH</i>                       | 2.01              | 0.0016                   | Complement factor H                             | Bt_13556_1_S1_a_at                      | 280816      |
| <i>CHI3L1</i>                    | 4.72              | 5.7x10 <sup>-6</sup>     | Chitinase 3-like 1                              | Bt_5238_1_S1_at                         | 286869      |
| <i>CLEC2D</i>                    | 2.17              | 2.0x10 <sup>-7</sup>     | C-type lectin domain family 2, member D         | Bt_24069_1_A1_at                        | 617565      |
| <i>CTSL1</i>                     | 7.34              | <10 <sup>-10</sup>       | Cathepsin L1                                    | Bt_10200_1_S1_at                        | 515200      |

|                   |      |                       |                                                     |                    |            |
|-------------------|------|-----------------------|-----------------------------------------------------|--------------------|------------|
| <i>CXCL13</i>     | 1.28 | 0.0022                | Chemokine (C-X-C motif) ligand 13                   | Bt_28088_1_S1_at   | 511674     |
| <i>CXCL14</i>     | 1.97 | 0.0004                | Chemokine (C-X-C motif) ligand 14                   | Bt_20397_1_S1_at   | 511771     |
| <i>CXCL2(x3)</i>  | 4.90 | $3.0 \times 10^{-7}$  | Chemokine (C-X-C motif) ligand 2                    | Bt_610_1_A1_at     | 281214     |
|                   | 5.72 | $4.0 \times 10^{-7}$  |                                                     | Bt_611_1_S2_at     |            |
|                   | 2.81 | 0.0006                |                                                     | Bt_611_1_S1_x_at   |            |
| <i>CXCL5</i>      | 14.8 | $<10^{-10}$           | Chemokine (C-X-C motif) ligand 5                    | Bt_7165_1_S1_at    | 281735     |
| <i>CXCR6</i>      | 2.23 | 0.0150                | Chemokine (C-X-C motif) receptor 6                  | Bt_21979_1_S1_at   | 506807     |
| <i>DEFB1</i>      | 2.29 | $1.9 \times 10^{-6}$  | Defensin, beta 1                                    | Bt_132_1_S1_at     | 281743     |
| <i>DKK1</i>       | 3.35 | $1.9 \times 10^{-5}$  | Dickkopf homolog 1 ( <i>Xenopus laevis</i> )        | Bt_13880_1_S1_at   | 504445     |
| <i>FABP4</i>      | 2.58 | $2.8 \times 10^{-8}$  | Fatty acid binding protein 4                        | Bt_97_1_S1_at      | 281759     |
| <i>GNLY (x2)</i>  | 2.87 | $1.1 \times 10^{-8}$  | Granulysin                                          | Bt_16101_1_S1_s_at | 404173     |
|                   | 2.93 | $3.0 \times 10^{-10}$ |                                                     | Bt_16101_1_S1_at   |            |
| <i>GPX3</i>       | 2.33 | 0.0489                | Glutathione peroxidase 3                            | Bt_12916_1_S1_at   | 281210     |
| <i>HCK</i>        | 2.14 | 0.0147                | Hemopoietic cell kinase                             | Bt_22050_1_S1_at   | 280814     |
| <i>HP</i>         | 2.04 | 0.0006                | Haptoglobin                                         | Bt_12553_1_S1_at   | 280692     |
| <i>ICOS</i>       | 2.20 | 0.0138                | Inducible T-cell co-stimulator                      | Bt_17957_1_A1_at   | 507026     |
| <i>(2 probes)</i> | 2.52 | 0.0146                |                                                     | Bt_24712_1_S1_at   |            |
| <i>IFIH1</i>      | 2.41 | 0.0079                | Interferon induced with helicase C domain 1         | Bt_16857_1_A1_at   | 535490     |
| <i>IgCgamma</i>   | 4.60 | $<10^{-10}$           | IgG2a heavy chain constant region                   | Bt_12490_2_A1_x_at | 404109     |
| <i>IGFBP1</i>     | 2.31 | $2.9 \times 10^{-6}$  | Insulin-like growth factor binding protein 1        | Bt_190_1_A1_at     | 282259     |
| <i>IGHG1(x3)</i>  | 2.99 | $<10^{-10}$           | Immunoglobulin heavy constant gamma 1               | Bt_12490_1_S1_at   | 281850     |
|                   | 3.00 | $<10^{-10}$           |                                                     |                    |            |
|                   | 3.05 | $<10^{-10}$           |                                                     |                    |            |
| <i>IGHM</i>       | 5.09 | $<10^{-10}$           | Immunoglobulin heavy constant mu                    | Bt_7783_1_S1_a_at  | 404057     |
| <i>IGJ</i>        | 3.49 | $<10^{-10}$           | Immunoglobulin J chain                              | Bt_3843_1_S1_at    | 280821     |
| <i>IGK</i>        | 3.90 | $3.9 \times 10^{-8}$  | Ig kappa chain                                      | Bt_12906_2_S1_at   | 506890     |
| <i>IGL@ ///</i>   | 2.69 | $3.8 \times 10^{-9}$  | Immunoglobulin light chain, lambda gene cluster /// | Bt_21368_1_S1_s_at | 505478 /// |
| <i>IGLL1</i>      |      |                       | immunoglobulin lambda-like polypeptide 1            |                    | 789205     |
| <i>IL1B</i>       | 2.73 | $9.3 \times 10^{-5}$  | Interleukin 1, beta                                 | Bt_4856_1_S2_at    | 281251     |
| <i>IL1R</i>       | 8.27 | $<10^{-10}$           | Interleukin 1 receptor                              | Bt_24073_1_S1_at   | 515640     |
| <i>IL1RN</i>      | 2.94 | $1.4 \times 10^{-6}$  | Interleukin 1 receptor antagonist                   | Bt_4199_1_S1_at    | 281860     |
| <i>IL8</i>        | 8.11 | $<10^{-10}$           | Interleukin 8                                       | Bt_155_1_S1_at     | 280828     |
| <i>IL8RB</i>      | 6.37 | $<10^{-10}$           | Interleukin 8 receptor, beta                        | Bt_4208_1_S1_at    | 281863     |
| <i>INDO</i>       | 2.10 | 0.0320                | Indoleamine-pyrrole 2,3 dioxygenase                 | Bt_27759_1_A1_at   | 506281     |
| <i>ISG15</i>      | 5.79 | $<10^{-10}$           | ISG15 ubiquitin-like modifier                       | Bt_12304_1_S1_at   | 281871     |
| <i>ISG20</i>      | 3.63 | $7.1 \times 10^{-8}$  | Interferon stimulated exonuclease gene 20kDa        | Bt_22275_1_A1_at   | 506604     |

|                    |       |                       |                                                                                    |                    |        |
|--------------------|-------|-----------------------|------------------------------------------------------------------------------------|--------------------|--------|
| <i>KNGI</i>        | 2.26  | 9.1x10 <sup>-10</sup> | Kininogen 1                                                                        | Bt_4210_1_A1_a_at  | 280833 |
| <i>LOC404062</i>   | 4.42  | 3.0x10 <sup>-9</sup>  | Immunoglobulin light chain VJ region                                               | Bt_21368_2_S1_x_at | 404062 |
| <i>LOC512486</i>   | 2.41  | 5.8x10 <sup>-7</sup>  | Similar to Interferon-induced guanylate-binding protein 1                          | Bt_9296_1_A1_at    | 512486 |
| <i>LOC512672</i>   | 2.17  | 0.0078                | Major histocompatibility complex, class I                                          | Bt_9217_1_A1_at    | 512672 |
| <i>LY9</i>         | 1.79  | 0.0049                | Lymphocyte antigen 9                                                               | Bt_28439_1_S1_a_at | 528926 |
| <i>MAP3K8</i>      | 2.24  | 0.0009                | Mitogen-activated protein kinase kinase kinase 8                                   | Bt_28561_1_S1_at   | 535622 |
| <i>MAPK13</i>      | 2.25  | 0.0085                | Mitogen-activated protein kinase 13                                                | Bt_800_1_S1_at     | 535327 |
| <i>MMP1</i>        | 28.8  | <10 <sup>-10</sup>    | Matrix metalloproteinase 1 (interstitial collagenase)                              | Bt_72_1_S1_at      | 281308 |
| <i>MMP13(x2)</i>   | 9.40  | <10 <sup>-10</sup>    | Matrix metalloproteinase 13 (collagenase 3)                                        | Bt_26268_1_A1_at   | 281914 |
|                    | 5.31  | <10 <sup>-10</sup>    |                                                                                    | Bt_39_1_S1_at      |        |
| <i>MMP3 (x2)</i>   | 14.04 | <10 <sup>-10</sup>    | Matrix metalloproteinase 3                                                         | Bt_18504_1_S1_at   | 281309 |
|                    | 12.93 | <10 <sup>-10</sup>    |                                                                                    | Bt_18504_2_S1_a_at |        |
| <i>MMP9</i>        | 5.29  | <10 <sup>-10</sup>    | Matrix metalloproteinase 9                                                         | Bt_4714_1_S1_at    | 282871 |
| <i>MPEG1</i>       | 2.22  | 1.1x10 <sup>-5</sup>  | Macrophage expressed gene 1                                                        | Bt_24238_1_A1_at   | 539997 |
| <i>MS4A1(x2)</i>   | 5.14  | <10 <sup>-10</sup>    | Membrane-spanning 4-domains, subfamily A, member 1                                 | Bt_2158_1_S1_at    | 505653 |
|                    | 2.53  | 7.8x10 <sup>-5</sup>  |                                                                                    | Bt_2158_2_S1_at    |        |
| <i>MX1</i>         | 2.22  | 0.0374                | Myxovirus (influenza virus) resistance 1                                           | Bt_4675_1_S1_a_at  | 280872 |
| <i>MX2</i>         | 3.13  | 0.0001                | Myxovirus (influenza virus) resistance 2 (mouse)                                   | Bt_8143_1_S1_at    | 280873 |
| <i>NFKBIZ</i>      | 2.81  | 2.8x10 <sup>-5</sup>  | Nuclear factor of kappa light polypeptide gene enhancer in B-cells inhibitor, zeta | Bt_8227_1_S1_at    | 282713 |
| <i>PDCD1LG2</i>    | 1.63  | 1.2x10 <sup>-7</sup>  | Programmed cell death 1 ligand 2                                                   | Bt_20653_1_A1_at   | 539392 |
| <i>PLAUR</i>       | 2.57  | 0.0122                | Plasminogen activator, urokinase receptor                                          | Bt_1942_1_S1_at    | 281983 |
| <i>POU2AF1</i>     | 4.84  | <10 <sup>-10</sup>    | POU class 2 associating factor 1                                                   | Bt_17854_1_A1_at   | 528475 |
| <i>PTGS1</i>       | 2.44  | 0.0015                | Prostaglandin-endoperoxide synthase 1                                              | Bt_2151_2_A1_at    | 282022 |
| <i>PTGS2 (x2)</i>  | 4.28  | <10 <sup>-10</sup>    | Prostaglandin-endoperoxide synthase 2                                              | Bt_15758_1_S1_at   | 282023 |
|                    | 1.87  | 0.0001                |                                                                                    | Bt_16478_1_A1_at   |        |
| <i>PTPN22</i>      | 2.48  | 5.9x10 <sup>-7</sup>  | Protein tyrosine phosphatase, non-receptor type 22                                 | Bt_9294_1_A1_at    | 518992 |
| <i>S100A12</i>     | 8.20  | <10 <sup>-10</sup>    | S100 calcium binding protein A12                                                   | Bt_357_1_S1_at     | 282467 |
| <i>S100A8</i>      | 9.45  | <10 <sup>-10</sup>    | S100 calcium binding protein A8                                                    | Bt_9360_1_S1_at    | 616818 |
| <i>S100A9 (x2)</i> | 8.28  | <10 <sup>-10</sup>    | S100 calcium binding protein A9                                                    | Bt_16201_1_S1_at   | 532569 |
|                    | 3.27  | 0.0018                |                                                                                    | Bt_16201_2_A1_at   |        |
| <i>SAMD9</i>       | 3.25  | 9.5x10 <sup>-9</sup>  | Sterile alpha motif domain containing 9                                            | Bt_28624_1_S1_at   | 514205 |
| <i>SELL</i>        | 2.75  | 0.0018                | Selectin L                                                                         | Bt_2314_1_S1_at    | 281485 |
| <i>SLA</i>         | 2.38  | 0.0368                | Src-like-adaptor                                                                   | Bt_784_1_A1_at     | 513589 |
| <i>SLAMF7</i>      | 2.51  | <10 <sup>-10</sup>    | SLAM family member 7                                                               | Bt_6980_1_S1_at    | 790164 |
| <i>SLC11A1</i>     | 2.08  | 0.0026                | Solute carrier family 11, member 1                                                 | Bt_5373_1_S1_at    | 282470 |

|               |      |                       |                                                  |                   |        |
|---------------|------|-----------------------|--------------------------------------------------|-------------------|--------|
| <i>SOD2</i>   | 4.43 | 8.8x10 <sup>-10</sup> | Superoxide dismutase 2,                          | Bt_4748_1_S1_at   | 281496 |
| <i>SPINK1</i> | 4.77 | <10 <sup>-10</sup>    | Serine peptidase inhibitor, Kazal type 1         | Bt_9636_1_S1_at   | 574092 |
| <i>SRGN</i>   | 3.12 | 0.0001                | Serglycin                                        | Bt_16048_1_S1_at  | 509501 |
| <i>TAP</i>    | 3.56 | 0.0004                | Tracheal antimicrobial peptide                   | Bt_510_1_S1_at    | 286837 |
| <i>TREM1</i>  | 2.40 | 0.0021                | Triggering receptor expressed on myeloid cells 1 | Bt_9208_1_S1_at   | 404547 |
| <i>UBD</i>    | 3.01 | 8.8x10 <sup>-6</sup>  | Ubiquitin D                                      | Bt_5897_2_S1_at   | 504548 |
| <i>VCAM1</i>  | 1.48 | 0.0011                | Vascular cell adhesion molecule 1                | Bt_7043_2_S1_a_at | 282118 |
| <i>ZAP70</i>  | 2.15 | 0.0238                | Zeta-chain (TCR) associated protein kinase 70kDa | Bt_20905_1_S1_at  | 504509 |

**DOWN-REGULATED IN SNEB COWS**

|                    |       |                       |                                                         |                    |        |
|--------------------|-------|-----------------------|---------------------------------------------------------|--------------------|--------|
| <i>CCNB1</i>       | -3.67 | <10 <sup>-10</sup>    | Cyclin B1                                               | Bt_15980_1_A1_at   | 327679 |
| <i>CRABP1</i>      | -1.89 | 0.0015                | Cellular retinoic acid binding protein 1                | Bt_396_2_S1_a_at   | 282201 |
| <i>FKBP4</i>       | -1.87 | 0.0055                | FK506 binding protein 4, 59kDa                          | Bt_4797_1_S1_at    | 508535 |
| <i>GSTA1</i>       | -1.38 | 0.0003                | Glutathione S-transferase A1                            | Bt_227_2_A1_at     | 777644 |
| <i>IGF1</i>        | -2.11 | 7.9x10 <sup>-10</sup> | Insulin-like growth factor 1                            | Bt_12750_1_S1_at   | 281239 |
| <i>IHH</i>         | -2.43 | 1.6x10 <sup>-5</sup>  | Indian hedgehog homolog (Drosophila)                    | Bt_22104_1_S1_at   | 522714 |
| <i>IL2</i>         | -3.10 | 0.0085                | Interleukin 2                                           | Bt_3307_1_A1_at    | 511596 |
| <i>MYB (x2)</i>    | -2.76 | <10 <sup>-10</sup>    | v-myb myeloblastosis viral oncogene homolog (avian)     | Bt_12781_1_S1_at   | 317776 |
|                    | -2.11 | 0.0116                |                                                         | Bt_12781_2_S1_a_at |        |
| <i>NTRK2 (x4)</i>  | -4.00 | <10 <sup>-10</sup>    | Neurotrophic tyrosine kinase, receptor, type 2          | Bt_20662_1_A1_at   | 505824 |
|                    | -2.15 | 0.003                 |                                                         | Bt_12217_3_A1_at   |        |
|                    | -2.28 | 0.0027                |                                                         | Bt_12217_2_S1_at   |        |
|                    | -2.15 | 0.0070                |                                                         | Bt_12217_1_S1_at   |        |
| <i>P2RY14 (x2)</i> | -2.24 | 2.9x10 <sup>-6</sup>  | Purinergic receptor P2Y, G-protein coupled, 14          | Bt_17368_2_S1_at   | 767936 |
|                    | -2.15 | 4.6x10 <sup>-5</sup>  |                                                         | Bt_17368_1_A1_at   |        |
| <i>PIK3R1</i>      | -1.96 | 0.0331                | Phosphoinositide-3-kinase, regulatory subunit 1 (alpha) | Bt_7236_1_S1_at    | 282307 |
| <i>PLA2G10</i>     | -4.50 | 1.6x10 <sup>-10</sup> | Phospholipase A2, group X                               | Bt_22381_1_S1_at   | 613966 |
| <i>PTH1H</i>       | -3.40 | 8.4x10 <sup>-6</sup>  | Parathyroid hormone-like hormone                        | Bt_12848_1_S1_at   | 286767 |

4  
5
