# Supplementary material
Source: PubMed Central journal article supplement (PMC2747344)
Supplement: 00064.2009_3.pdf [file 00064.2009_3.pdf]

1  
2  
3  
4  
5

Supplementary Table 3. Differentially expresses genes in endometrium of SNEB cows mapped to the IPA database which were not included in immune and inflammatory gene dataset.

| Gene Symbol<br>(no. probes)      | Real<br>Fold<br>change<br>s | Adj P-Value<br>(Bonferroni) | Gene Title                                                         | Probe Names        | Entrez<br>Gene |
|----------------------------------|-----------------------------|-----------------------------|--------------------------------------------------------------------|--------------------|----------------|
| <b>UP-REGULATED IN SNEB COWS</b> |                             |                             |                                                                    |                    |                |
| <i>ABO</i>                       | 1.89                        | 0.0010                      | ABO blood group                                                    | Bt_28229_1_A1_s_at | 515340         |
| <i>AGR2</i>                      | 2.69                        | <10 <sup>-10</sup>          | Anterior gradient homolog 2 ( <i>Xenopus laevis</i> )              | Bt_29129_1_S1_at   | 415112         |
| <i>AKAP5</i>                     | 1.76                        | 0.0004                      | A kinase (PRKA) anchor protein 5                                   | Bt_372_1_S1_at     | 281612         |
| <i>ARHGAP15</i>                  | 2.07                        | 3.1x10 <sup>-5</sup>        | Rho GTPase activating protein 15                                   | Bt_24715_1_S1_at   | 616246         |
| <i>ARHGAP30</i>                  | 1.99                        | 0.0037                      | Rho GTPase activating protein 30                                   | Bt_865_1_S1_at     | 538835         |
| <i>ATF3</i>                      | 2.81                        | 5.9x10 <sup>-8</sup>        | Activating transcription factor 3                                  | Bt_18533_1_S1_at   | 515266         |
| <i>BCL2L15</i>                   | 2.64                        | 5.1x10 <sup>-9</sup>        | BCL2-like 15                                                       | Bt_22010_1_S1_at   | 509786         |
| <i>BHLHB2</i>                    | 1.90                        | 0.0007                      | Basic helix-loop-helix domain containing, class B, 2               | Bt_23123_1_S1_at   | 506945         |
| <i>BIN2</i>                      | 1.79                        | 0.0034                      | Bridging integrator 2                                              | Bt_11875_1_S1_at   | 515025         |
| <i>C15H11ORF34</i>               | 7.57                        | <10 <sup>-10</sup>          | Chromosome 11 open reading frame 34 ortholog                       | Bt_6410_1_A1_at    | 505518         |
| <i>C3orf57(x2)</i>               | 3.71                        | 1.1x0 <sup>-9</sup>         | Hypothetical protein LOC780785                                     | Bt_14395_2_S1_at   | 780785         |
|                                  | 4.22                        | <10 <sup>-10</sup>          |                                                                    | Bt_14395_1_A1_at   |                |
| <i>CLCA3</i>                     | 3.52                        | 4.5x10 <sup>-5</sup>        | Chloride channel, calcium activated, family member 3               | Bt_3885_2_S1_at    | 281694         |
| <i>DKFZP586H2123</i>             | 2.37                        | 2.4x10 <sup>-5</sup>        | Regeneration associated muscle protease                            | Bt_6021_1_S1_at    | 513841         |
| <i>EAF2</i>                      | 1.93                        | 0.0460                      | ELL associated factor 2                                            | Bt_17120_1_A1_at   | 613523         |
| <i>EGLN3</i>                     | 1.91                        | 0.0005                      | Egl nine homolog 3 ( <i>C. elegans</i> )                           | Bt_23232_1_S1_at   | 535578         |
| <i>EVI2B</i>                     | 2.44                        | 2.7x10 <sup>-8</sup>        | Ecotropic viral integration site 2B                                | Bt_6963_1_A1_at    | 617442         |
| <i>GATM</i>                      | 1.87                        | 0.0281                      | Glycine amidinotransferase (L-arginine:glycine amidinotransferase) | Bt_23250_2_S1_at   | 414732         |

|                         |      |                       |                                                                          |                   |                         |
|-------------------------|------|-----------------------|--------------------------------------------------------------------------|-------------------|-------------------------|
| <i>GIMAP7</i>           | 2.29 | 0.0006                | GTPase, IMAP family member 7                                             | Bt_1088_1_S1_a_at | 510988                  |
| <i>GLDC</i>             | 1.98 | 0.0015                | Glycine dehydrogenase<br>(decarboxylating)                               | Bt_13486_1_A1_at  | 507688                  |
| <i>GPC3</i>             | 1.59 | 0.0018                | Glypican 3                                                               | Bt_11178_1_S1_at  | 615239                  |
| <i>GPR171</i>           | 3.23 | $2.6 \times 10^{-8}$  | G protein-coupled receptor 171                                           | Bt_8343_1_S1_at   | 767929                  |
| <i>HI5C11ORF34</i>      | 3.33 | $<10^{-10}$           | Chromosome 11 open reading frame 34<br>ortholog                          | Bt_6410_2_A1_s_at | 505518                  |
| <i>JMJD2B</i>           | 2.89 | $3.9 \times 10^{-10}$ | Jumonji domain containing 2B                                             | Bt_1983_1_S1_at   | 508141                  |
| <i>LOC100125415</i>     | 2.72 | 0.0001                | GTPase, IMAP family member                                               | Bt_13777_1_S1_at  | 100125415               |
| <i>LOC281812 ///</i>    | 3.46 | $1.0 \times 10^{-9}$  | (Similar to) fibroblast growth factor<br>binding protein                 | Bt_279_1_S1_at    | 281812 ///              |
| <i>LOC783341</i>        |      |                       |                                                                          |                   | 783341                  |
| <i>LOC504309</i>        | 2.06 | 0.0010                | Similar to C-type lectin domain family<br>2, member h                    | Bt_24228_1_S1_at  | 504309                  |
| <i>LOC507126</i>        | 2.25 | 0.0006                | Similar to basement membrane-induced<br>gene                             | Bt_22179_1_S1_at  | 507126                  |
| <i>LOC511106</i>        | 2.80 | 0.0028                | Serpin peptidase inhibitor, clade B like                                 | Bt_9693_1_S1_at   | 511106                  |
| <i>LOC512010</i>        | 1.80 | 0.0130                | Similar to centaurin delta 1                                             | Bt_7337_2_S1_at   | 512010                  |
| <i>LOC512304</i>        | 1.94 | 0.0016                | Similar to ENPP5                                                         | Bt_14001_1_A1_at  | 512304                  |
| <i>LOC515917</i>        | 2.21 | $1.3 \times 10^{-8}$  | Similar to trophoblast Kunitz domain<br>protein 2                        | Bt_6700_1_A1_at   | 515917                  |
| <i>LOC530077</i>        | 2.81 | $9.2 \times 10^{-6}$  | Similar to GTPase, IMAP family<br>member 5                               | Bt_21820_1_S1_at  | 530077                  |
| <i>LOC534929</i>        | 2.75 | $1.6 \times 10^{-8}$  | Similar to VNN2 protein                                                  | Bt_19160_1_A1_at  | 534929                  |
| <i>LOC537017</i>        | 1.93 | 0.0029                | Similar to cytidine monophosphate-N-<br>Setylneuraminic acid hydroxylase | Bt_21869_1_S1_at  | 537017                  |
| <i>LOC784517</i>        | 2.12 | 0.0187                | Similar to cationic amino acid<br>transporter 5                          | Bt_18469_1_S1_at  | 784517                  |
| <i>LOC785058</i>        | 2.76 | 0.0034                | Hypothetical protein LOC785058                                           | Bt_9679_1_S1_at   | 785058                  |
| <i>LOC787253</i>        | 3.26 | 0.0001                | Similar to Extracellular proteinase<br>inhibitor                         | Bt_9675_1_S1_at   | 787253                  |
| <i>LOC789703</i>        | 5.21 | $<10^{-10}$           | Hypothetical protein LOC789703                                           | Bt_16790_1_S1_at  | 789703                  |
| <i>LOC100138905 ///</i> | 2.07 | 0.0001                | Similar to zinc finger protein 665 Or<br>415                             | Bt_18469_2_A1_at  | 100138905<br>/// 787057 |
| <i>LOC787057</i>        |      |                       |                                                                          |                   |                         |
| <i>MATN4</i>            | 7.36 | $<10^{-10}$           | Matrilin 4                                                               | Bt_15484_2_A1_at  | 504598                  |
| <i>MGC137405</i>        | 2.36 | 0.0489                | GTPase, IMAP family member                                               | Bt_21722_1_S1_at  | 530031                  |
| <i>MGC159584</i>        | 4.17 | $<10^{-10}$           | Hypothetical LOC510480                                                   | Bt_20356_1_S1_at  | 510480                  |
| <i>MGC165939</i>        | 2.85 | $4.3 \times 10^{-5}$  | Hypothetical LOC517231                                                   | Bt_17889_1_A1_at  | 517231                  |

|                   |      |                       |                                                                       |                    |        |
|-------------------|------|-----------------------|-----------------------------------------------------------------------|--------------------|--------|
| <i>MT1E</i>       | 5.80 | $2.9 \times 10^{-9}$  | Metallothionein 1E                                                    | Bt_23042_1_S1_at   | 404071 |
| <i>MUC13</i>      | 4.60 | $<10^{-10}$           | Mucin 13, cell surface associated                                     | Bt_12140_1_S1_at   | 511430 |
| <i>PDK4</i>       | 3.16 | 0.0410                | Pyruvate dehydrogenase kinase,<br>isozyme 4                           | Bt_13330_2_A1_at   | 507367 |
| <i>PFKFB3</i>     | 2.66 | $9.6 \times 10^{-5}$  | 6-phosphofructo-2-kinase/fructose-2,6-<br>biphosphatase 3             | Bt_12314_1_S1_at   | 407183 |
| <i>PLA2G2D1</i>   | 2.26 | 0.0031                | Calcium-dependent phospholipase A2<br>PLA2G2D1                        | Bt_22208_1_S1_at   | 494318 |
| <i>PLAC8</i>      | 3.31 | $7.6 \times 10^{-8}$  | Placenta-specific 8                                                   | Bt_15912_1_S1_at   | 767910 |
| <i>PQLC3</i>      | 1.97 | 0.0330                | PQ loop repeat containing 3                                           | Bt_28700_1_S1_at   | 506958 |
| <i>SAMSNI(x2)</i> | 3.46 | $<10^{-10}$           | SAM domain, SH3 domain and nuclear<br>localization signals 1          | Bt_28225_1_A1_at   | 534171 |
|                   | 2.82 | $5.5 \times 10^{-7}$  |                                                                       | Bt_28225_2_S1_at   |        |
| <i>SDS (x2)</i>   | 7.36 | $<10^{-10}$           | Serine dehydratase                                                    | Bt_5878_1_A1_at    | 514346 |
|                   | 6.06 | $<10^{-10}$           |                                                                       | Bt_5878_2_S1_at    |        |
| <i>SIX3</i>       | 2.22 | $3.4 \times 10^{-6}$  | SIX homeobox 3                                                        | Bt_7524_1_A1_at    | 616756 |
| <i>STC1</i>       | 6.40 | $<10^{-10}$           | Stanniocalcin 1                                                       | Bt_10272_1_S1_at   | 338078 |
| <i>TGM3(x2)</i>   | 8.16 | $<10^{-10}$           | Transglutaminase 3                                                    | Bt_13628_2_S1_a_at | 505080 |
|                   | 4.05 | $2.6 \times 10^{-9}$  |                                                                       | Bt_13628_1_S1_at   |        |
| <i>TMEM156</i>    | 2.57 | $1.8 \times 10^{-5}$  | Transmembrane protein 156                                             | Bt_27087_1_A1_at   | 533681 |
| <i>TRPA1(x2)</i>  | 7.39 | $<10^{-10}$           | Transient receptor potential cation<br>channel, subfamily A, member 1 | Bt_19959_2_A1_at   | 505317 |
|                   | 5.16 | $<10^{-10}$           |                                                                       | Bt_19959_1_S1_at   |        |
| <hr/>             |      |                       |                                                                       |                    |        |
| Unidentified      |      |                       |                                                                       |                    |        |
| ---               | 5.29 | $<10^{-10}$           | ---                                                                   | Bt_7128_1_S1_at    | ---    |
| ---               | 2.62 | $<10^{-10}$           | ---                                                                   | Bt_6813_1_A1_at    | ---    |
| 2 probes          | 7.25 | $<10^{-10}$           | ---                                                                   | Bt_2501_2_A1_at    | ---    |
|                   | 4.12 | $<10^{-10}$           | ---                                                                   | Bt_2501_1_S1_at    | ---    |
| ---               | 2.02 | $<10^{-10}$           | ---                                                                   | Bt_16425_1_A1_at   | ---    |
| ---               | 2.63 | $<10^{-10}$           | ---                                                                   | Bt_19792_1_A1_at   | ---    |
| ---               | 2.54 | $<10^{-10}$           | ---                                                                   | Bt_9122_1_A1_at    | ---    |
| ---               | 2.67 | $1.5 \times 10^{-10}$ | ---                                                                   | Bt_8875_2_S1_at    | ---    |
| ---               | 3.63 | $2.3 \times 10^{-10}$ | ---                                                                   | Bt_20696_1_A1_at   | ---    |
| ---               | 2.81 | $7.4 \times 10^{-10}$ | ---                                                                   | Bt_6176_1_S1_at    | ---    |
| ---               | 2.10 | $1.4 \times 10^{-8}$  | ---                                                                   | Bt_27446_1_A1_at   | ---    |
| 2 probes          | 2.74 | $7.1 \times 10^{-8}$  | ---                                                                   | Bt_22215_2_A1_at   | ---    |
|                   | 2.09 | 0.0007                | ---                                                                   | Bt_22215_1_S1_at   | ---    |
| ---               | 2.06 | $8.2 \times 10^{-8}$  | ---                                                                   | Bt_8796_1_S1_at    | ---    |

|          |      |                      |     |                    |     |
|----------|------|----------------------|-----|--------------------|-----|
| 2 probes | 3.32 | 1.4x10 <sup>-7</sup> | --- | Bt_29777_1_S1_at   | --- |
|          | 3.77 | 0.0003               | --- | Bt_29777_1_S1_x_at | --- |
| ---      | 2.03 | 1.3x10 <sup>-5</sup> | --- | Bt_13522_1_S1_at   | --- |
| ---      | 2.44 | 4.8x10 <sup>-5</sup> | --- | Bt_21851_1_A1_at   | --- |
| ---      | 2.33 | 8.8x10 <sup>-5</sup> | --- | Bt_24547_1_S1_at   | --- |
| ---      | 1.46 | 0.0004               | --- | Bt_29505_1_S1_at   | --- |
| ---      | 2.48 | 0.0008               | --- | Bt_12589_1_S1_at   | --- |
| ---      | 2.31 | 0.0012               | --- | Bt_6785_1_A1_at    | --- |
| ---      | 1.91 | 0.0018               | --- | Bt_20308_1_S1_at   | --- |
| ---      | 1.83 | 0.0024               | --- | Bt_6786_1_S1_at    | --- |
| ---      | 1.90 | 0.0036               | --- | Bt_22797_1_A1_at   | --- |
| 2 probes | 1.82 | 0.0044               | --- | Bt_24417_1_A1_at   | --- |
|          | 2.01 | 0.0165               | --- | Bt_24417_2_S1_at   | --- |
| ---      | 2.00 | 0.0048               | --- | Bt_26925_1_S1_at   | --- |
| ---      | 1.39 | 0.0168               | --- | Bt_20501_1_S1_at   | --- |
| ---      | 2.92 | 0.0181               | --- | Bt_17514_1_S1_at   | --- |
| ---      | 1.80 | 0.0212               | --- | Bt_25812_1_A1_at   | --- |
| ---      | 2.40 | 0.0261               | --- | Bt_26011_1_A1_at   | --- |
| ---      | 1.71 | 0.0467               | --- | Bt_20452_1_A1_at   | --- |

***DOWN-REGULATED IN SNEB COWS***

|                |       |                      |                                                                |                  |                      |
|----------------|-------|----------------------|----------------------------------------------------------------|------------------|----------------------|
| <i>ACTC1</i>   | -1.85 | 0.0225               | Actin, alpha, cardiac muscle 1                                 | Bt_12491_1_A1_at | 533219               |
| <i>ADCY8</i>   | -1.93 | 3.2x10 <sup>-7</sup> | Similar to brain adenylate cyclase 8                           | Bt_24461_1_A1_at | 535017               |
| <i>BCHE</i>    | -1.91 | 0.0001               | Butyrylcholinesterase                                          | Bt_28385_1_A1_at | 514657 ///<br>534616 |
| <i>CDCA7</i>   | -2.49 | 3.7x10 <sup>-6</sup> | Cell division cycle associated 7                               | Bt_6441_1_S1_at  | 614893               |
| <i>CDCA7L</i>  | -1.83 | 0.0034               | Cell division cycle associated 7-like                          | Bt_1404_2_S1_at  | 514631               |
| <i>CETN4</i>   | -2.28 | 0.0201               | Centrin 4                                                      | Bt_2882_2_S1_at  | 505789               |
| <i>CHST9</i>   | -2.35 | 2.2x10 <sup>-6</sup> | Carbohydrate (N-acetylgalactosamine<br>4-O) sulfotransferase 9 | Bt_21861_2_A1_at | 525909               |
| <i>CLDN10</i>  | -2.00 | 0.0254               | Claudin 10                                                     | Bt_16487_1_S1_at | 506545               |
| <i>CLIC6</i>   | -3.29 | <10 <sup>-10</sup>   | Chloride intracellular channel 6                               | Bt_22741_1_S1_at | 507243               |
| <i>COL11A1</i> | -1.96 | 0.0005               | Collagen, type XI, alpha 1                                     | Bt_21409_1_A1_at | 287013               |
| <i>COL4A4</i>  | -1.75 | 0.0223               | Collagen, type IV, alpha 4                                     | Bt_29725_1_S1_at | 407107               |
| <i>DMGDH</i>   | -2.27 | 0.0052               | Dimethylglycine dehydrogenase                                  | Bt_17379_1_A1_at | 504453               |

|                      |       |                       |                                                                                           |                    |            |
|----------------------|-------|-----------------------|-------------------------------------------------------------------------------------------|--------------------|------------|
| <i>FLNA</i>          | -2.34 | 0.0011                | Filamin A, alpha (actin binding protein 280)                                              | Bt_959_2_S1_at     | 281165     |
| <i>GPR133</i>        | -3.39 | <10 <sup>-10</sup>    | G protein-coupled receptor 133                                                            | Bt_22380_1_S1_at   | 528174     |
| <i>ISOC1</i>         | -2.28 | 0.0002                | Isochorismatase domain containing 1                                                       | Bt_25297_1_A1_at   | 540524     |
| <i>KCNN2</i>         | -2.07 | 2.1x10 <sup>-5</sup>  | Potassium intermediate/small conductance calcium-activated channel, subfamily N, member 2 | Bt_28008_1_S1_s_at | 404177     |
| <i>KERA</i>          | -1.63 | 0.0066                | Keratocan                                                                                 | Bt_5391_1_S1_at    | 280785     |
| <i>LOC515053</i>     | -2.07 | 0.0035                | Similar to chromosome 21 open reading frame 62                                            | Bt_22629_1_A1_at   | 515053     |
| <i>LOC532409</i>     | -2.04 | 0.0238                | Similar to high-mobility group box 3                                                      | Bt_11711_1_A1_at   | 532409     |
| <i>LOC787239</i>     | -1.68 | 0.0014                | Similar to Synaptotagmin-1 (Synaptotagmin I) (SytI) (p65)                                 | Bt_23205_1_S1_s_at | 787239     |
| <i>LRRC17</i>        | -1.81 | 0.0191                | Leucine rich repeat containing 17                                                         | Bt_4886_1_A1_at    | 777690     |
| <i>MGC127236</i>     | -2.63 | 2.5x10 <sup>-10</sup> | Amyloid P component-like                                                                  | Bt_15901_1_S1_at   | 504879     |
| <i>MSX1</i>          | -2.32 | 0.0029                | MSH homeobox 1                                                                            | Bt_1656_1_S1_at    | 286872     |
| <i>NOV</i>           | -2.76 | 5.3x10 <sup>-5</sup>  | Nephroblastoma overexpressed                                                              | Bt_13482_2_S1_at   | 505727     |
| <i>OLFM4</i>         | -2.03 | <10 <sup>-10</sup>    | Olfactomedin 4                                                                            | Bt_14100_1_S1_at   | 515082     |
| <i>PDZK1</i>         | -1.40 | 0.0475                | PDZ domain containing 1                                                                   | Bt_5058_1_S1_at    | 534439     |
| <i>PSAT1 (x3)</i>    | -2.95 | <10 <sup>-10</sup>    | Phosphoserine aminotransferase 1                                                          | Bt_13588_2_S1_at   | 533044     |
|                      | -2.65 | 5.8x10 <sup>-9</sup>  |                                                                                           | Bt_13588_1_A1_at   |            |
|                      | 2.61  | 1.7x10 <sup>-8</sup>  |                                                                                           | Bt_13588_3_A1_at   |            |
| <i>RHBG</i>          | -2.06 | 3.9x10 <sup>-7</sup>  | Rh family, B glycoprotein                                                                 | Bt_27940_1_A1_at   | 282709     |
| <i>ROPN1L</i>        | -2.12 | 0.0069                | Ropporin 1-like                                                                           | Bt_22715_2_S1_at   | 515565     |
| <i>SDC2 (x2)</i>     | -2.00 | 0.0002                | Syndecan 2                                                                                | Bt_2494_2_S1_a_at  | 615785     |
|                      | -1.92 | 0.0167                |                                                                                           | Bt_11462_1_S1_at   |            |
| <i>SHISA2</i>        | -3.91 | 1.6x10 <sup>-7</sup>  | Shisa homolog 2 ( <i>Xenopus laevis</i> )                                                 | Bt_22389_1_S1_at   | 617336     |
| <i>SLC2A5</i>        | -2.89 | <10 <sup>-10</sup>    | Solute carrier family 2, member 5                                                         | Bt_19805_1_A1_at   | 282868     |
| <i>LOC786885 ///</i> | -1.99 | 1.6x10 <sup>-8</sup>  | Similar to SLC2A5 protein /// solute carrier family 2, member 5                           | Bt_12774_1_S1_at   | 282868 /// |
| <i>SLC2A5</i>        |       |                       |                                                                                           |                    | 786885     |
| <i>SOSTDC1</i>       | -2.05 | <10 <sup>-10</sup>    | Sclerostin domain containing 1                                                            | Bt_27202_1_A1_at   | 523184     |
| <i>STMN2</i>         | -2.29 | 0.0054                | Stathmin-like 2                                                                           | Bt_3704_3_A1_at    | 534991     |
| <i>TAC3</i>          | -2.46 | 5.6x10 <sup>-7</sup>  | Tachykinin 3                                                                              | BtAffx_1_13_S1_at  | 281513     |
| <i>UHRF1 (x2)</i>    | -2.39 | 0.0024                | Ubiquitin-like with PHD and ring finger domains 1                                         | Bt_27328_1_S1_at   | 530411     |
|                      | -2.42 | 0.0007                |                                                                                           | Bt_28379_1_S1_at   |            |

| Unidentified |       |                      |     |                  |     |
|--------------|-------|----------------------|-----|------------------|-----|
| 2 probes     | -5.95 | $<10^{-10}$          | --- | Bt_1296_1_S1_at  | --- |
|              | -3.85 | $<10^{-10}$          | --- | Bt_1296_2_S1_at  | --- |
| ---          | -4.61 | $<10^{-10}$          | --- | Bt_24179_1_A1_at | --- |
| ---          | -3.62 | $<10^{-10}$          | --- | Bt_24977_1_A1_at | --- |
| ---          | -3.15 | $<10^{-10}$          | --- | Bt_21900_1_S1_at | --- |
| ---          | -3.80 | $<10^{-10}$          | --- | Bt_26467_1_A1_at | --- |
| ---          | -2.71 | $9.8 \times 10^{-9}$ | --- | Bt_22741_2_A1_at | --- |
| ---          | -3.10 | $1.2 \times 10^{-8}$ | --- | Bt_17034_1_A1_at | --- |
| ---          | -1.97 | $8.6 \times 10^{-5}$ | --- | Bt_5915_1_A1_at  | --- |
| ---          | -1.68 | 0.0016               | --- | Bt_29555_1_A1_at | --- |
| ---          | -2.22 | 0.0004               | --- | Bt_2304_1_A1_at  | --- |
| ---          | -2.40 | 0.0019               | --- | Bt_25285_1_A1_at | --- |
| ---          | -1.92 | 0.0051               | --- | Bt_19097_2_S1_at | --- |
| ---          | -1.78 | 0.0107               | --- | Bt_28181_1_S1_at | --- |
| ---          | -1.54 | 0.0291               | --- | Bt_19258_1_A1_at | --- |

6  
7  
8  
9
